1 **A NOVEL METHOD FOR MEASURING TEXTURE USING A FOOD**  
2 **PROCESSOR**

3

4 Jiro KANAMORI

5 R&D Division for Future Creation, Fuji Oil Holdings Inc.

6 4-3 Kinunodai, Tsukubamirai-shi, Ibaraki 300-2497 JAPAN

7 [kanamori.jiro@gmail.com](mailto:kanamori.jiro@gmail.com)

8

9 **RUNNING TITLE**

10 TEXTURE MEASUREMENT USING A FOOD PROCESSOR

11

12 **ABSTRACT**

13 Measurement of food texture is becoming increasingly important to help  
14 prevent mis-swallowing in elderly individuals. However, it is difficult to estimate food  
15 texture for mastication and swallowing. In this study, a mixing-recording method was  
16 applied to measure food texture. A commercial food processor was used to homogenize  
17 food gels, and the torque was monitored as an electric current value, which was  
18 correlated with the viscosity of Newtonian fluid. Agar and gelatin gels at several  
19 concentrations were applied to the mixing-recording system, and individual mixing  
20 curves were obtained. The current values had a different tendency at each mixing stage.  
21 At the beginning of the mixing, when lumps of the original gel were present, current  
22 values of gelatin were higher than those of agar. From the middle of mixing, the  
23 fractured pastes of high-concentration agar gels had little mobility, and current values  
24 decreased, indicating that gelatin was more cohesive than agar. The current values of

25 low-concentration agar and gelatin were correlated with the hardness of the gels and  
26 were aligned on the same correlation curve, indicating that the viscosity of the fractured  
27 paste was correlated with the original gel hardness under certain conditions. Moreover,  
28 measurements of agar gels of different sizes revealed that the texture was size  
29 dependent. Thus, the mixing-recording method had several advantages over  
30 conventional methods, including time- and size-dependent fracturing and bolus  
31 properties, and could be useful for the measurement of food texture in terms of  
32 mastication and swallowing.

33

#### 34 **KEY WORDS**

35 Texture, mixing-recording method, fracturing, mastication, swallowing, gel

36

#### 37 **PRACTICAL APPLICATIONS**

38 The author established a novel method for measuring food texture. The  
39 mixing-recording method revealed the physical properties of gels during the fracturing  
40 process. The results revealed both similarities and differences between agar and gelatin  
41 gels in a different way than conventional methods. Thus, this method could be useful for  
42 measurement of food texture to predict mastication and swallowing properties.

43

#### 44 **INTRODUCTION**

45 Food is chewed and swallowed as a bolus, the physical properties of which  
46 influence the risk of mis-swallowing and aspiration pneumonia (Groher, 1987). The  
47 relationship between food properties and mis-swallowing is one of the most important  
48 problems associated with food intake in elderly individuals. Mis-swallowing can be

49 induced by various food properties, e.g., adhesiveness, such as that of rice cakes, and  
50 noncohesiveness, such as that observed for water and flour (Kumagai and Tanigome,  
51 2011).

52 Many methods have been established to measure the physical properties of  
53 food associated with mastication and swallowing. Viscosity measurement at a shear rate  
54 of 50 (1/s) for liquid food is recommended by the American Dietetic Association (2002)  
55 and the Japanese Society of Dysphagia Rehabilitation (2013); however, these  
56 measurements do not always correlate with human sensory data (Yamagata and  
57 Kayashita, 2015). Although many researchers have used the corn plate viscometer, this  
58 instrument is difficult to apply to heterogeneous food with solids because of the narrow  
59 gap. Texture profiling analysis (TPA), measurement by multiple compressions to  
60 calculate several parameters, including hardness, cohesiveness, and adhesiveness, is  
61 often used for solid foods (Friedman et al., 1963) and can be used for the classification  
62 of hospital foods empirically good for consumption in patients with dysphagia (Sakai et  
63 al., 2006). The Japanese Ministry of Health, Labour, and Welfare (2009) adopted TPA as  
64 the standard for analysis of foods for patients with dysphagia. However, although TPA  
65 has yielded good results for the development and monitoring of foods for patients with  
66 dysphagia at hospitals, there are several challenges associated with TPA (Nishinari et al.,  
67 2013). For example, the hardness values for some types of foods, such as rubber-like  
68 gels and clay-like foods, do not indicate the breaking force, which is related to a sense  
69 of hardness. When TPA is applied to liquid foods, the value of cohesiveness is too high,  
70 despite their noncohesiveness. Other measurements based on human mastication and  
71 swallowing, i.e., sensory evaluation, videofluoroscopy, measuring muscle potential,  
72 flow velocity by pulse Doppler analysis, etc., have also been used (Chen, 2009).

73 Although data from these methods may seem to be reliable because they are derived  
74 from real human mastication and swallowing, there are many problems with these data,  
75 such as high cost, poor accuracy, and individual differences. More reliable, accurate,  
76 and simpler methods are needed to measure food texture in relation to mastication and  
77 swallowing.

78 The mixing-recording method (measuring physical properties by monitoring of  
79 the mixer torque during mixing) has been used for a long time to measure wheat dough  
80 (Bloksma and Bushuk, 1988). Moreover, nonwheat food dough can be analyzed using a  
81 food processor as a mixer (Kanamori, 2016). Food processors (i.e., cutting mixers or  
82 food choppers) are kitchen appliances with cutting edges that rotate at a high speed.  
83 Because the fracturing of solid food can be monitored by the mixing-recording method,  
84 I hypothesized that this method could be used to obtain information regarding  
85 mastication and swallowing properties.

86 Agar and gelatin are often used to study the swallowing properties of foods.  
87 Gelatin is known to be more cohesive than agar; however, there are no differences in the  
88 flow velocity of a bolus, as measured by the pulse Doppler method (Moritaka and  
89 Nakazawa, 2010).

90 In this study, a mixing-recording measurement method was established for  
91 application to agar and gelatin gels of several concentrations and sizes. The applicability  
92 of the method for food texture analysis was also evaluated.

93

## 94 **MATERIALS AND METHODS**

### 95 **Materials**

96 Agar and gelatin were high-grade reagents purchased from Kishida Chemicals

97 Co. Ltd. (Tsukuba, Japan). Glycerin was a special-grade reagent purchased from Wako  
98 Chemicals. Co. Ltd. (Tokyo, Japan). Silicone oil of low viscosity (52 mPa·s;  
99 KF-98-50CS) and high viscosity (3300 mPa·s; KF-98-3000CS) was obtained from  
100 Shin-Etsu Chemical Co., Ltd. (Tokyo, Japan).

101

## 102 **Texture measurement**

103 Sample preparation for texture measurement was carried out according to the  
104 methods of Moritaka and Nakazawa (2010) with minor modification. The agar  
105 suspension was heated at 105°C for 10 min by autoclaving, and the gelatin suspension  
106 was heated at 60°C for 30 min in a water bath. The solutions were placed in an acrylic  
107 container 40 mm in diameter and 15 mm in height and stood for 15 h at 10°C. Texture  
108 measurement for the TPA method was performed according to the methods of the  
109 Ministry of Health, Labour, and Welfare of Japan (2009), except that compression  
110 strains of 67 % and 90% of sample height were used. A creep meter (RE-3305;  
111 Yamaden Co. Ltd., Tokyo, Japan) was used at a rate of 10 mm/s with an acrylic plunger  
112 (20 mm in diameter and 8 mm in height). Measurements were repeated five times.

113

## 114 **Mixing-recording system**

115 A mixing-recording system was used as described previously with the  
116 following modifications (Kanamori, 2016). The system consisted of an electric power  
117 source (UPS310HS; Yutaka Electric Mfg. Co. Ltd., Tokyo, Japan), a power transformer  
118 (Boltslider N-130-10; Yamabishidenki, Tokushima, Japan), a food processor for kitchen  
119 use (Mini chopper FC-200; Yamazen Co., Osaka, Japan), an ammeter (Clamp on Leak  
120 Hitester type 3283; Hioki E.E. Co., Nagano, Japan), a voltage data logger (LabJack

121 U3-HV; Sumitomo Precision Products Co., Ltd., Amagasaki, Japan), and a personal  
122 computer with data logging software (DAQ-FactoryExpress, Windows 7/32 bit;  
123 Sumitomo Precision Products Co., Ltd., Amagasaki, Japan). The electric power of the  
124 food processor was supplied by an electric power source at 50 Hz, and the voltage was  
125 limited by the power transformer to control the rotating speed. The torque of the food  
126 processor was detected by an ammeter, and the data were captured using a personal  
127 computer with a voltage data logger and software. The rotating speed was controlled at  
128 1,000 rpm when running on idle just before sample measurements. Electric current  
129 values when running on idle just before sample measurements were subtracted from the  
130 data. Data were captured at 0.01-s intervals and smoothed by averaging  $\pm 0.05$  s for  
131 each mixing time point. Sample measurements were performed three times, and the data  
132 were averaged at each mixing time point.

133

#### 134 **Mixing-recording measurement of standard fluid**

135 Two types of Newtonian fluids (glycerin and silicone oil) were used as  
136 standards. Glycerin viscosity was adjusted by water dilution and temperature changes.  
137 Previously reported values (Segur and Oberstar, 1951) were used for the glycerin  
138 viscosity at each concentration and temperature. Silicone oil with low viscosity  
139 (KF-98-50CS) and high viscosity (KF-98-3000CS) were mixed in various proportions  
140 to form a range of viscosities, which were measured with a rheometer (MCR302;  
141 Anton-Paar Japan, Tokyo, Japan) having a 25-mm corn plate at a shear rate of 10/s. One  
142 hundred milliliters of the fluid was applied to the mixing-recording system, and electric  
143 current values were obtained by averaging values from mixing time points at 9–10 s.

144

## 145 **Mixing-recording measurement of agar and gelatin**

146 Samples were dissolved as described for texture measurement and gelled in a  
147 plastic container (120 × 90 × 30 mm) overnight at 10°C. Gels were cut into an  
148 appropriate size (20-mm cubes) just before measurement, and 100-g samples were  
149 placed in the food processor. Paste samples of different sizes were prepared by  
150 fracturing sample gels for 120 s using the food processor, and the temperature was  
151 readjusted to 10°C. Mixing-recording measurements were performed for 120 s.

152

## 153 **Statistical analysis**

154 Statistical analysis was performed using IBM SPSS (ver. 22) software.  
155 Analysis of variance was carried out, followed by Tukey's post-hoc test.

156

## 157 **RESULTS**

### 158 **Mixing-recording measurement of standard fluid**

159 The response of the mixing-recording system was investigated using glycerin  
160 and silicone oil (Fig. 1). A linear relationship with a high correlation coefficient ( $r =$   
161 0.99) was observed between the electric current values and viscosities.

162

### 163 **Texture measurement**

164 The texture properties of agar and gelatin at various concentrations are shown  
165 in Fig. 2. Agar gels were broken at a strain of 67%, whereas gelatin gels were not. Both  
166 gels were broken at a strain of 90%. Adhesiveness values of high-concentration (>  
167 1.0%) agar were high and difficult to evaluate because the gel fragments were attached  
168 to the limb of the plunger.

169

## 170 **Mixing-recording measurement of sample gels of various concentrations**

171 Most gel samples were fractured during mixing by the food processor and  
172 became smooth pastes, flowing with rotation of the edges. High-concentration ( $\geq 1.5\%$ )  
173 agar did not flow after fracturing. Identical mixing curves for each sample were  
174 obtained by monitoring the current value during 120 s of mixing (Fig. 3). The current  
175 values of both agar and gelatin decreased during mixing. A sharp decrease was observed  
176 in the curves of high-concentration ( $\geq 1.5\%$ ) agar because of racing of the mixer. Fig. 4  
177 shows the current values plotted against the concentrations of the gels. The current  
178 values increased as the concentration increased, with the exception of those of  
179 high-concentration agar at 30 s, which decreased. The high-concentration gelatin values  
180 were higher than the agar values at both after 1 and 30 s of mixing.

181 To investigate the relationship between texture and mixing properties, the  
182 current values at certain time points were plotted against the hardness values obtained  
183 from TPA at a strain of 90% (Fig. 5). At the beginning of the mixing (time point: 1 s),  
184 the current values of gelatin were higher than those of agar (Fig. 5A). In the middle  
185 stage of the mixing (time point: 30 s), most sample gels were fractured into pastes.  
186 When the current values of gelatin at 30 s were plotted against the hardness values, a  
187 linear correlation was observed (Fig. 5B). For low-concentration ( $\leq 1.0\%$ ) agar, the  
188 current values were correlated with the hardness values, whereas those of  
189 high-concentration ( $\geq 1.2\%$ ) agar were not. Moreover, 1.5% agar did not flow at 30 s,  
190 and the current decreased by mixer racing, as described above, although the hardness  
191 value was smaller than that of 2.4% gelatin. Data for both gelatin and low-concentration  
192 agar were aligned on the same correlation curve with a high correlation coefficient ( $r =$



193 1.00). The same tendency was observed using the values at 60 and 120 s, with a slightly  
194 smaller correlation coefficient (data not shown). No significant relationships were  
195 observed between the current values of 30-s mixing and the cohesiveness and  
196 adhesiveness values (data not shown).

197

### 198 **Mixing-recording measurement of sample gels of various sizes**

199 Size dependence was investigated using 0.8% agar with 10-mm cubes, 20-mm  
200 cubes, and pastes (Fig. 6). Individual mixing curves were obtained, even though the  
201 difference between each sample was smaller than that in the former experiment. At the  
202 early stage of mixing, the current value increase as the size increased. The difference  
203 became smaller during mixing. The differences of integrated current values at each 10-s  
204 interval were significant between all samples below 20 s time point and between paste  
205 samples and others from 20 to 40 s ( $p < 0.05$ ). No significant differences were observed  
206 for all samples at over 40 s of mixing.

207

## 208 **DISCUSSION**

209 In this study, typical Newtonian fluids (glycerin and silicone oil) were applied  
210 to a mixing-recording system, and linear regression was observed as described  
211 previously (Kanamori, 2016). The current value is thought to indicate some type of  
212 viscosity, and the viscosity of liquid foods affects swallowing (Groher, 1987). Because  
213 solid foods are swallowed as a bolus, the bolus viscosity is an essential parameter. Thus,  
214 mixing-recording measurements of food samples can reveal the viscosity of a mimic  
215 bolus of the sample directly and may be suitable for estimating the swallowing  
216 properties of food in a simple, reliable manner.

217           Here, the mixing-recording method was applied to agar and gelatin gels  
218 commonly used as gelling agents to study foods for individuals with dysphagia. The  
219 results of these samples for TPA at a strain of 90% were similar to those of a previous  
220 study (Moritaka and Nakazawa, 2010). Identical mixing curves were obtained from  
221 individual gelling agents and concentrations. Solid food is masticated and swallowed as  
222 a bolus. The bolus viscosity is affected by the state of fracturing during mastication,  
223 which can differ among individuals. Therefore, it is important to measure viscosity at  
224 various fracturing rates. The mixing-recording measurement is suitable for this purpose  
225 because the viscosities of various fractured states are detected continuously as current  
226 values during mixing.

227           The mixing-recording measurement was time-dependent. In the early stage of  
228 mixing, when lumps of gel remained, the current values of gelatin were higher than  
229 those of agar. The current value indicated the energy of fracturing gels and may be  
230 derived from the physical properties of gels, which was difficult to explain by TPA  
231 measurement. In the middle stage of the mixing, the current of 1.5% agar decreased by  
232 mixer racing. This could be explained by the observation that the cohesiveness of agar  
233 was lower than that of gelatin, even though the cohesiveness values of agar measured by  
234 TPA were approximately the same at agar concentrations of 0.6% and 1.5%.  
235 Additionally, the low-flow phenomenon appeared in the mixing of relatively hard gels  
236 but not in relatively soft gels. The mixing-recording method was able to detect flow or  
237 low-flow properties, whereas such measurements were difficult with TPA.

238           The swallowing properties of gel foods can be estimated by measurement of  
239 flow velocity by the pulse Doppler method, as shown previously, and flow velocity has  
240 been shown to be correlated with hardness but not cohesiveness or adhesiveness

241 (Moritaka and Nakazawa, 2010; Tanigome et al., 2013). These results were similar to  
242 those of the present study, i.e., the current values of relatively soft gels were correlated  
243 with the hardness values. It is possible that the bolus viscosity of a soft gel may  
244 correspond to the gel hardness. However, in previous studies, experiments were  
245 performed with relatively soft gels, as is suitable for foods to be consumed by elderly  
246 individuals. The difference between agar and gelatin was clear when harder gels were  
247 investigated in the present study. Notably, only a few types of gelling agents have been  
248 investigated; therefore, more studies of various types of solid samples are needed.

249 In this study, larger sample sizes were associated with higher current values  
250 during the early stages of mixing, which was reasonable because the energy for  
251 mastication is higher as the sample size increases. As the current value of agar  
252 decreased during mixing, size reduction before mixing resulted in lower current values  
253 at the beginning of mixing and reached a steady-state value earlier. Although food size  
254 is one of the most important factors in human mastication and swallowing, conventional  
255 methods, such as TPA, are applicable only to samples of an appropriate size. Thus, the  
256 mixing-recording method may be useful from the perspective of size-dependent  
257 measurement.

258 Another advantage of the mixing-recording method is simplicity; it is not  
259 necessary to prepare materials with different sample sizes and shapes. Actual foods  
260 having various sizes and formulas can be applied for the measurement, and the effects  
261 of the different sizes and formulas can also provide valuable information. This method  
262 could also be applied for food quality control at hospitals and factories, with a short  
263 measurement time.

264 In the present study, a mixing-recording method for the measurement of food

265 texture was established. A commercial food processor was tested as a mixer; however,  
266 the equipment used in this study was not optimized. Because food processors function  
267 as food fracturing machines, they are suitable for the measurement of actual foods  
268 having a wide range of textures. However, other types of mixers, such as pins, paddles,  
269 and Z-blades, should be examined for application with different types of samples in  
270 future studies.

271

## 272 **CONCLUSION**

273 In this study, a mixing-recording method using a commercial food processor  
274 was developed for texture measurement. Identical mixing curves were obtained from the  
275 measurement of agar and gelatin gels of several concentrations and sizes. The method  
276 was able to estimate the time and size dependence of fracturing, along with various  
277 texture and bolus properties. Moreover, this method was also useful for the  
278 measurement of food texture, particularly as it related to mastication and swallowing.

279

## 280 **ETHICAL STATEMENTS**

281 Conflict of Interest: The author declares that he has no conflict of interest.

282 Ethical Review: This study did not involve any human or animal testing.

283

## 284 **ACKNOWLEDGMENTS**

285 The author would like to thank Dr. K. Tsumura (Fuji Oil Holdings Inc.) who  
286 offered continuing support and constant encouragement. The author would also like to  
287 thank Prof. Jun Kayashita (Prefectural University of Hiroshima) for critical reading of  
288 the manuscript.

289

290  
291  
292  
293  
294  
295  
296  
297  
298  
299  
300  
301  
302  
303  
304  
305  
306  
307

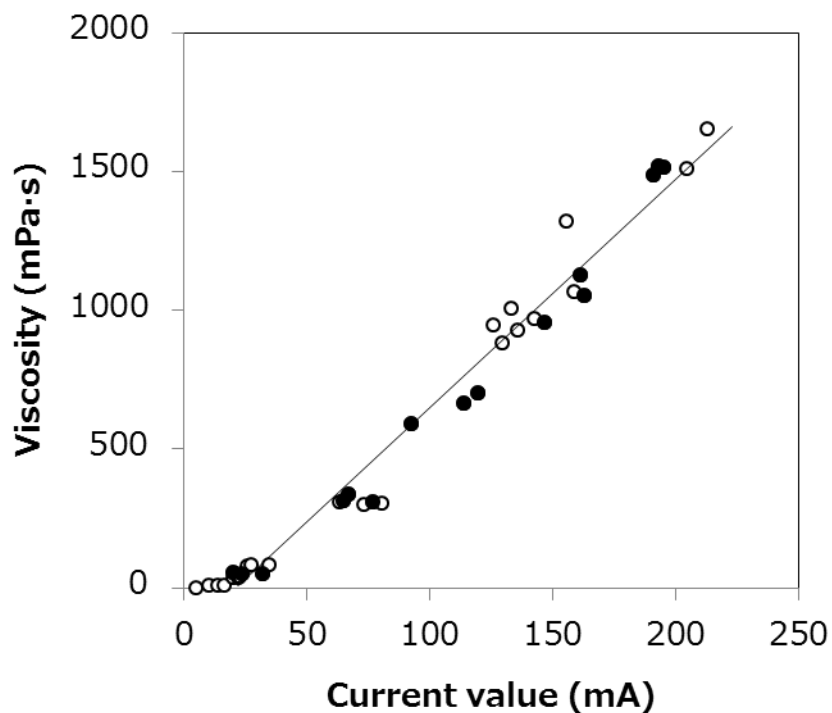

FIG. 1. RELATIONSHIP BETWEEN CURRENT VALUE AND VISCOSITY

○, glycerin; ●, silicone oil. Curve-fitting was performed using all data.

308  
309  
310  
311  
312  
313  
314  
315  
316  
317  
318  
319  
320  
321  
322  
323  
324

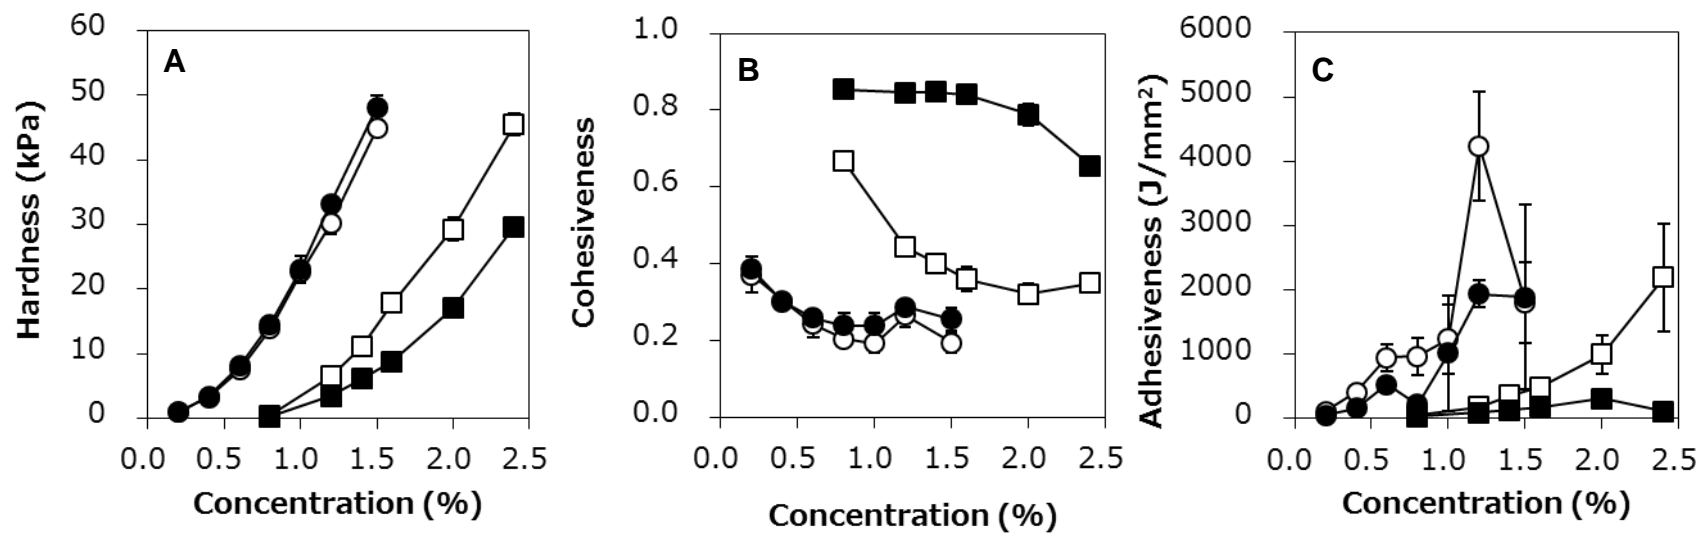

FIG. 2. TEXTURE PROPERTIES OF AGAR AND GELATIN

●, agar, 67% strain; ○, agar, 90% strain; ■, gelatin, 67 % strain; □, gelatin, 90 % strain.

325

326

327

328

329

330

331

332

333

334

335

336

337

338

339

340

341

342

343

344

345

346

347

348

349

350

351

352

353

354

355

356

357

358

359

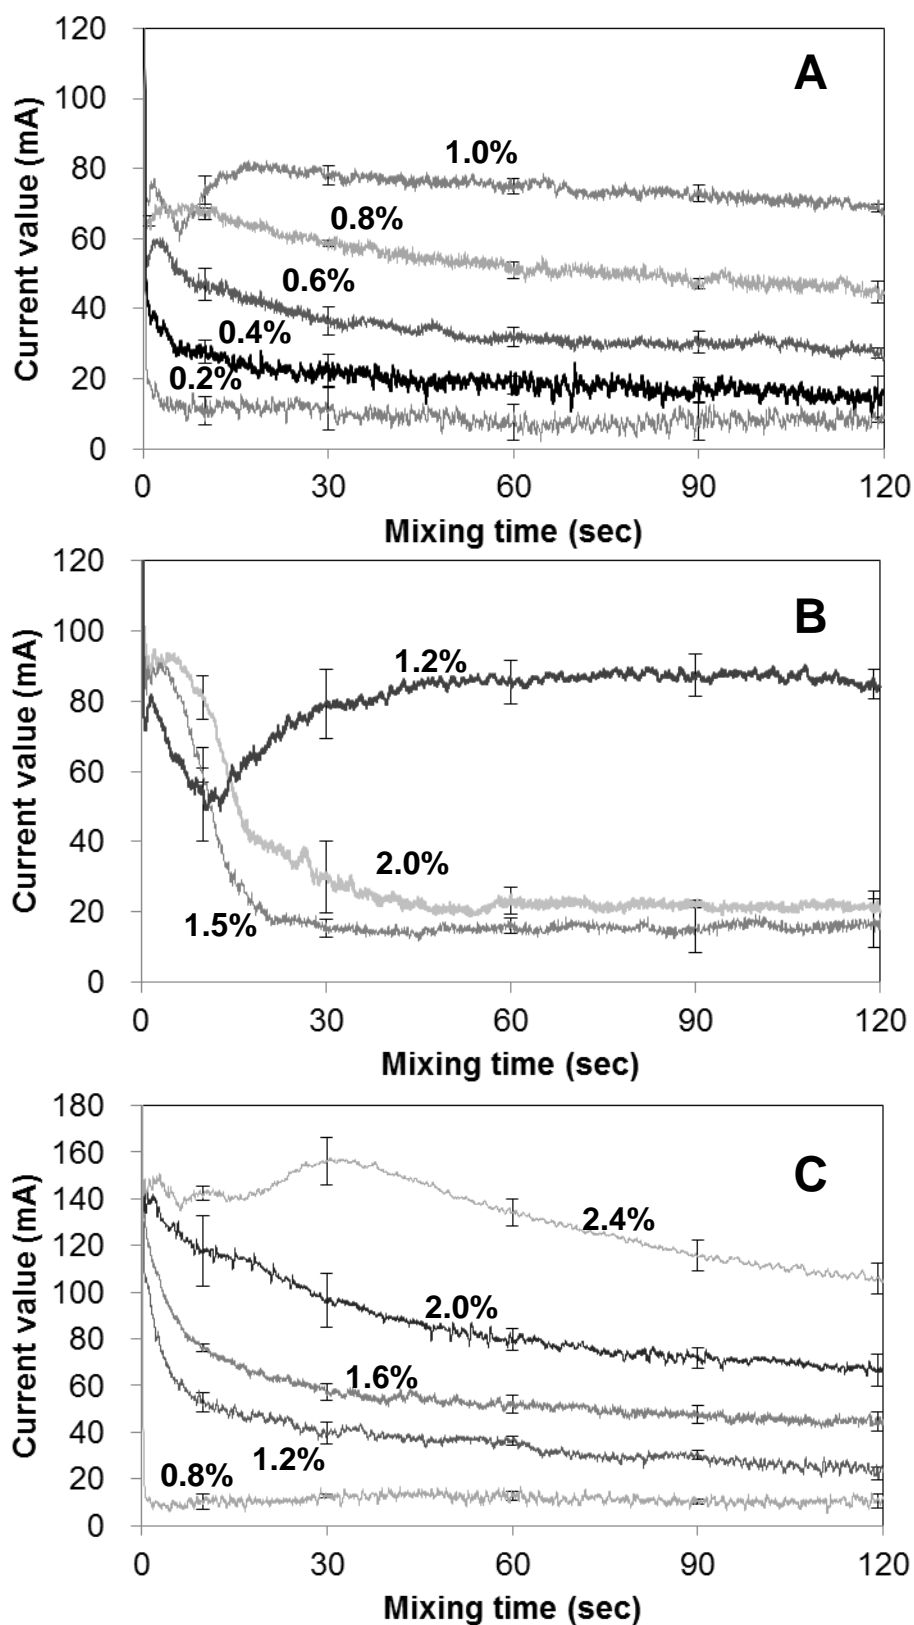

FIG. 3 MIXING CURVES OF AGAR AND GELATIN AT DIFFERENT CONCENTRATIONS

A: Agar with a relatively low concentration. B: Agar with a relatively high concentration. C: Gelatin. Error bars represent means  $\pm$  standard deviations for triplicate experiments averaged for intervals of  $\pm 0.5$  s (101 data points) at each mixing time.

360  
361  
362  
363  
364  
365  
366  
367  
368  
369  
370  
371  
372  
373  
374  
375  
376  
377  
378  
379

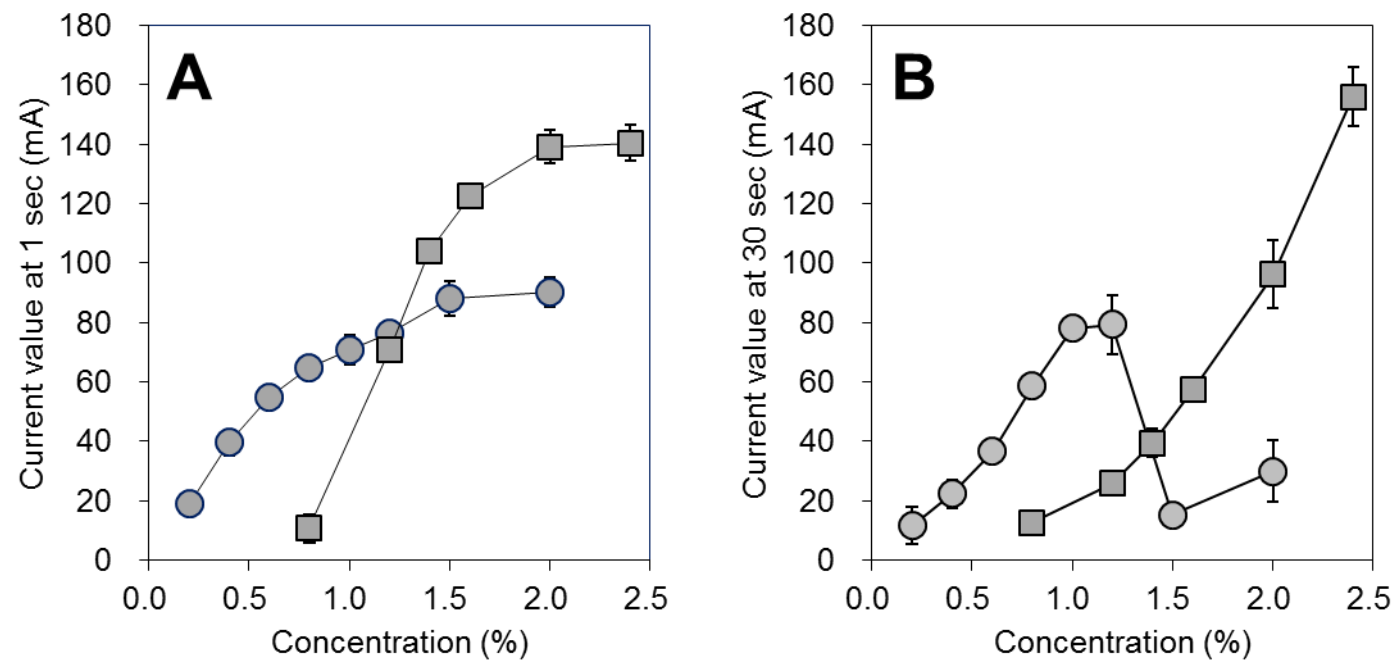

FIG. 4 CURRENT VALUES OF AGAR AND GELATIN  
●, agar; ■, gelatin.



380  
381  
382  
383  
384  
385  
386  
387  
388  
389  
390  
391  
392  
393  
394  
395  
396  
397  
398  
399  
400  
401

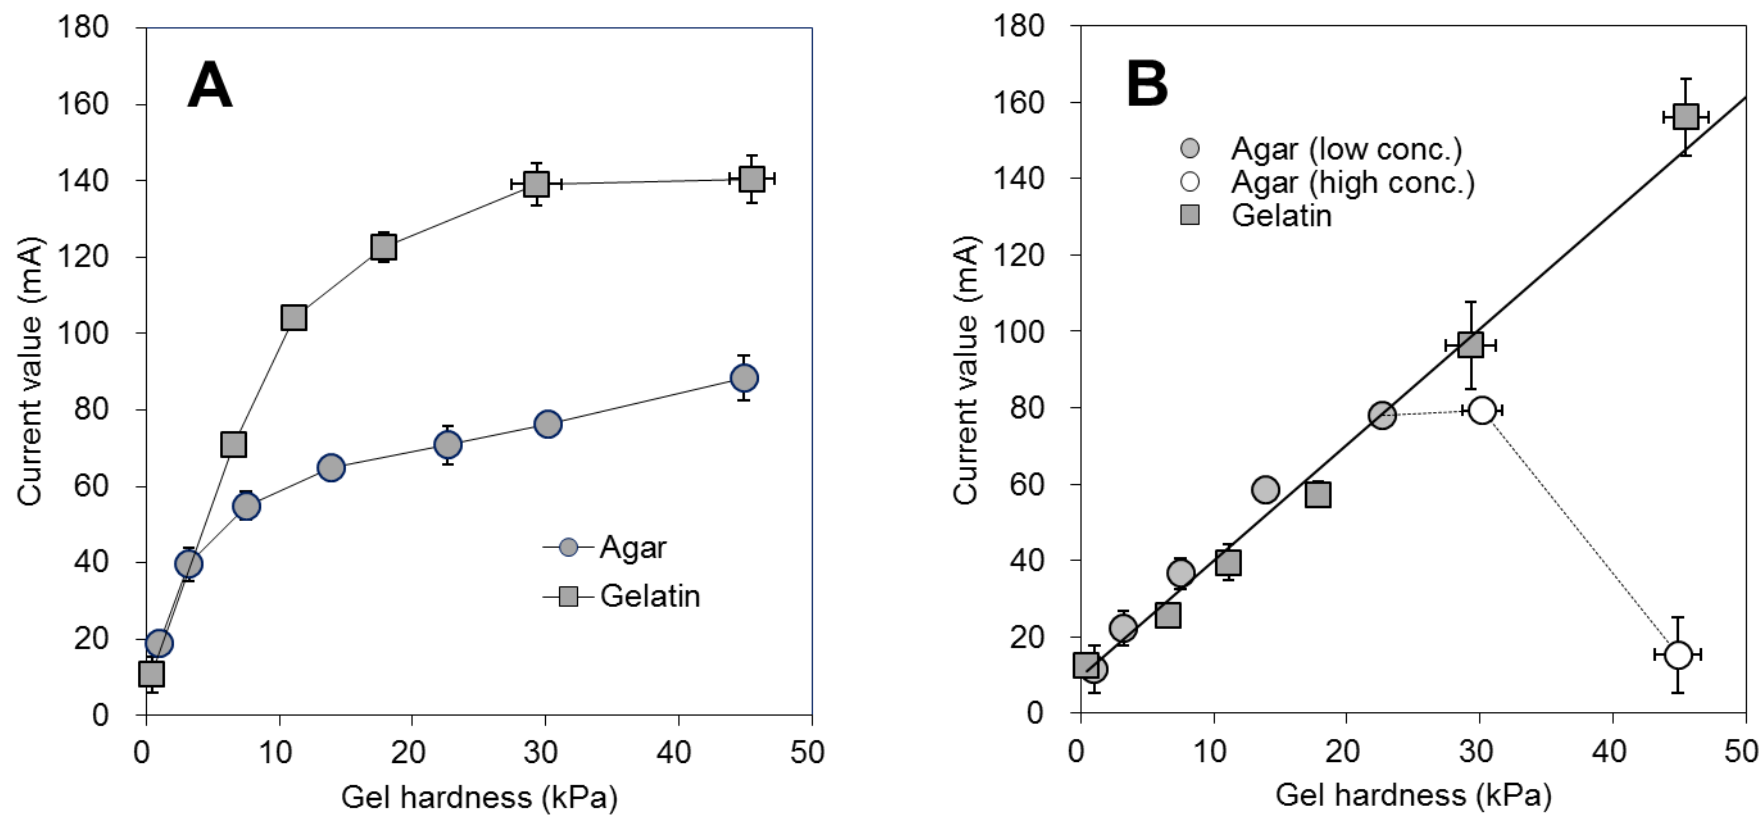

FIG. 5 RELATIONSHIP BETWEEN THE CURRENT VALUE OF THE MIXER AND THE GEL HARDNESS VALUE MEASURED BY TPA  
A: Current value at 1 s of mixing and gel hardness. B: Current value at 30 s of mixing and gel hardness. Gel hardness was measured at 90% strain. The correlation in B was calculated using agar and gelatin together, except for high-concentration agar.

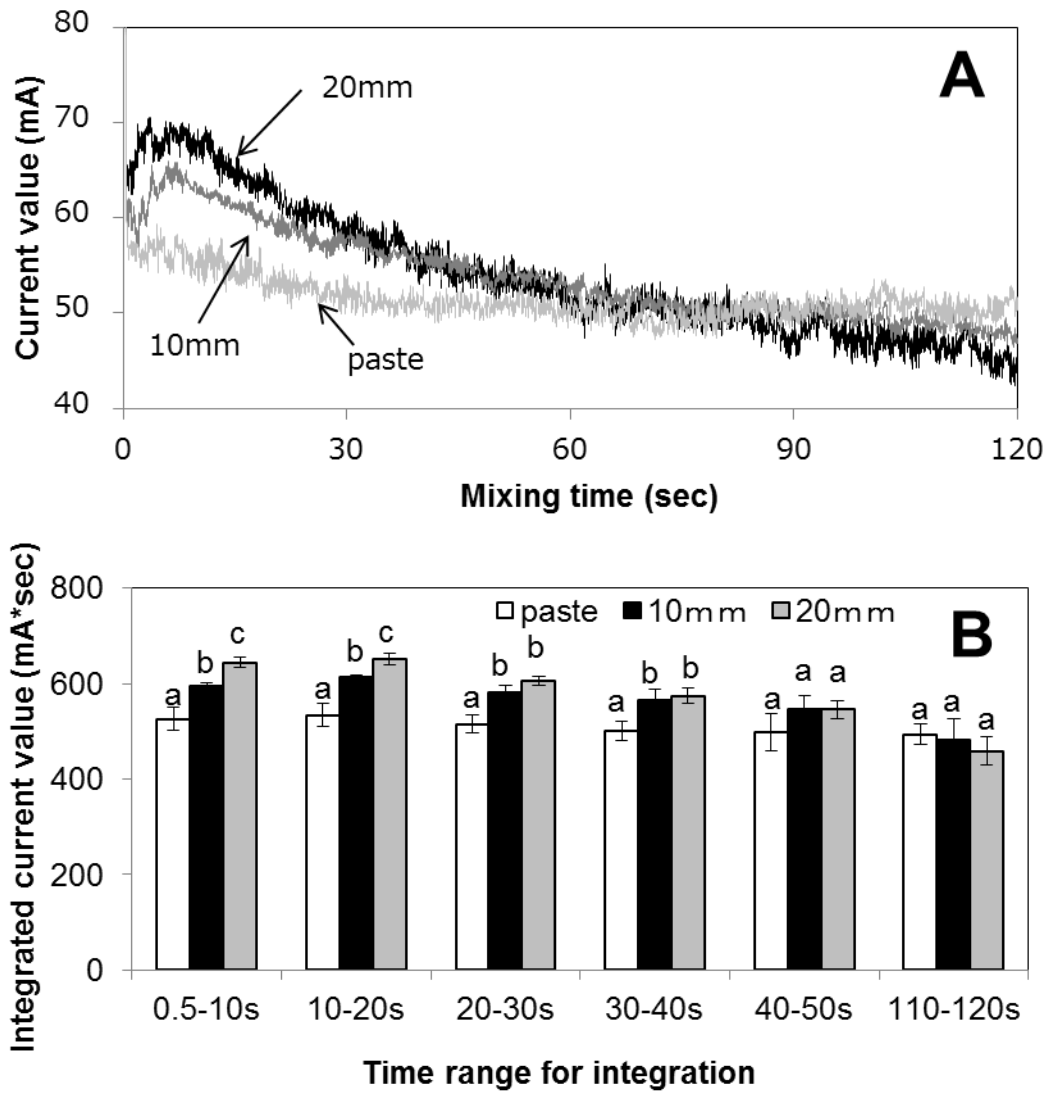

FIG. 6 MIXING PROPERTIES OF AGAR GELS OF DIFFERENT SIZES

A: Mixing curves. B: Integrated current values of the mixing curves. Current values were integrated every 10 s. The beginning overcurrent from 0 to 0.5 s was discarded. Error bars represent  $\pm$  standard deviations for triplicate experiments. Different letters indicate significant difference at  $p < 0.05$  in each time range.

## 436 REFERENCES

- 437 BLOKSMA, A. H. and BUSHUK, W. 1988. Rheology and chemistry of dough. in *Wheat Chemistry and*  
438 *Technology, third ed., volume II.* (Y. Pomeranz, ed.) pp. 131-217, American Association of Cereal Chemists,  
439 St. Paul, America.
- 440
- 441 CHEN, J., 2009. Food oral processing—a review. *Food Hydrocolloid.*, 23, 1-25. doi:  
442 10.1016/j.foodhyd.2007.11.013
- 443
- 444 FRIEDMAN, H. H., WHITNEY, J. E., and SZCZESNIAK, A. S., 1963. The texturometer—a new  
445 instrument for objective texture measurement. *J. Food Sci.*, 28, 390-396. doi:  
446 10.1111/j.1365-2621.1963.tb00216.x
- 447
- 448 FUJITANI, J., UYAMA, R., OKOSHI, H., KAYASHITA, J., KOSHIRO, A., TAKAHASHI, K., MAEDA,  
449 H., FUJISHIMA, I. and UEDA, K., 2013. Japanese Society of Dysphagia Rehabilitation: classification of  
450 dysphagia modified food. *Jpn J Dysphagia Rehabil.* 17, 255–67. (in Japanese)
- 451
- 452 GROHER, M. E., 1987. Bolus management and aspiration pneumonia in patients with pseudobulbar  
453 dysphagia. *Dysphagia*, 1, 215-216. doi: 10.1007/BF02406920
- 454
- 455 HASEGAWA-TANIGOME, A., OGURA, K., AKIMA, A., KOHYAMA, K., KUMAGAI, H. and  
456 KUMAGAI, H., 2013. Relationship between the parameters obtained by 2-bite texture profile analysis  
457 (TPA) and the velocity through the pharynx measured by the ultrasonic pulse Doppler method. *Japan J. Food*  
458 *Eng.*, 14, 87-96. doi: 10.11301/jsfe.14.87 (in Japanese)
- 459
- 460 KANAMORI, J., 2016. *Cereal Chem.*, in press. doi: 10.1094/CCHEM-12-15-0258-R
- 461
- 462 KUMAGAI, H. and TANIGOME, A., 2011. Enge syogaisya you kaigogyoku no tekusutyah · bussei (Texture  
463 and physical properties of food for dysphagia.). in *Sinka suru syokuhin tekusutyah kenkyuu (Developping*  
464 *studies of food texture.)* (Yamano, Y. eds.) NTS, Tokyo, Japan. (in Japanese)
- 465
- 466 MICHIWAKI, Y., YOKOYAMA, M, MICHI, K., OHKOSHI, H., TAKAHASHI, T. and HIROTA, E., 2000.  
467 Texture analysis of diets for patients with dysphagia. *Jpn. J. Dysphagia Rehabil.*, 4, 28-32. (in  
468 Japanese)
- 469
- 470 MINISTRY OF HEALTH, LABOUR AND WELFARE, 2009. Indication Permission of Food Safety Bureau  
471 and Department of Food Safety. No.051101 (placed under Consumer Affairs Agency, Government of Japan  
472 from 2010) (in Japanese)
- 473
- 474 MORITAKA, H., and NAKAZAWA, F., 2010. Flow velocity of a bolus in the pharynx and rheological  
475 properties of agar and gelatin. *J. Texture Stud.*, 41, 139-152. doi: 10.1111/j.1745-4603.2010.00218.x

476

477 NATIONAL DYSPHAGIA DIET TASK FORCE, AND AMERICAN DIETETIC ASSOCIATION, 2002.

478 National Dysphagia Diet: Standardization for Optimal Care. American Dietetic Associati.

479

480 NISHINARI, K., KOHYAMA, K., KUMAGAI, H., FUNAMI, T., and BOURNE, M. C. 2013. Parameters of  
481 texture profile analysis. *Food Sci. Tech. Res.*, *19*, 519-521. doi: 10.3136/fstr.19.519

482

483 SAKAI, M., EGASHIRA, F., KANAYA, S. and KAYASHITA, J., 2006. Comparison of food physical  
484 properties with reference to clinically effective stepwise swallowing foods. *Jpn. J. Dysphagia Rehabil.*, *10*,  
485 239-248. (in Japanese)

486

487 SEGUR, J. B., and OBERSTAR, H. E., 1951. Viscosity of glycerol and its aqueous solutions. *Ind. Eng.*  
488 *Chem.*, *43*, 2117-2120. doi: 10.1021/ie50501a040

489

490 YAMAGATA, Y. and KAYASHITA, J., Evaluation of the Japanese Dysphasia Diet 2013 by the JS DR  
491 Dysphagia Diet Committee (thickened liquid) by using several types of thickened liquids. *Jpn. J. Dysphagia*  
492 *Rehabil.*, *19*, 109-116. (in Japanese)

493
